# Supplementary material
Source: Research Square preprint supplement (doi:10.21203/rs.3.rs-9620143/v1)

**Supplementary materials**

**Supplementary Figure 1** Validation of the risk model. (**A**) Risk curves and survival states (validation Set GSE72094). (**B**) KM Survival curves (validation Set GSE72094). (**C**) 1, 3 and 5 year ROC curves (validation Set GSE72094).


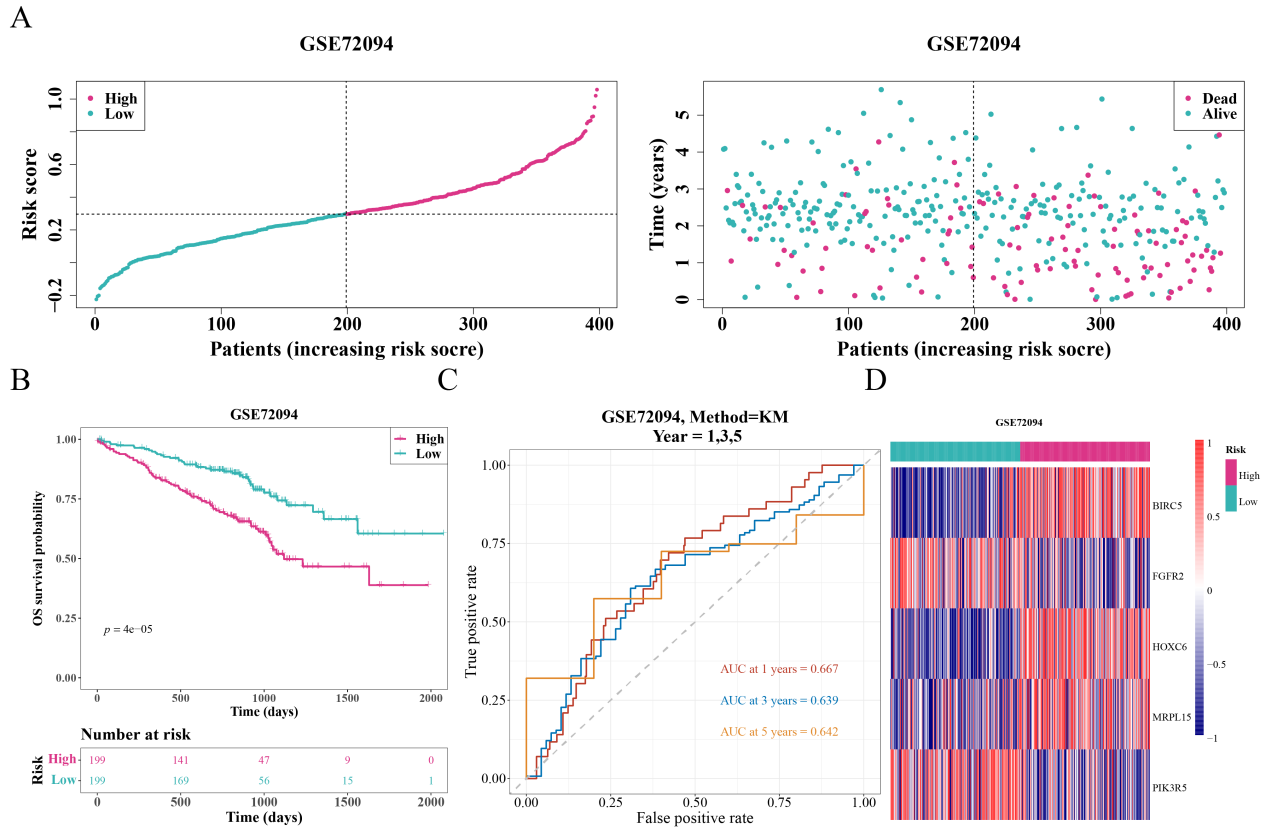


**Supplementary Figure 2** Cell annotation and differentiation results. (**A**) Clustering of UMAP cell taxa in nLung, tLung and tL/B groupings. (**B**) Cell type annotation. (**C**) Cell differentiation of different samples.


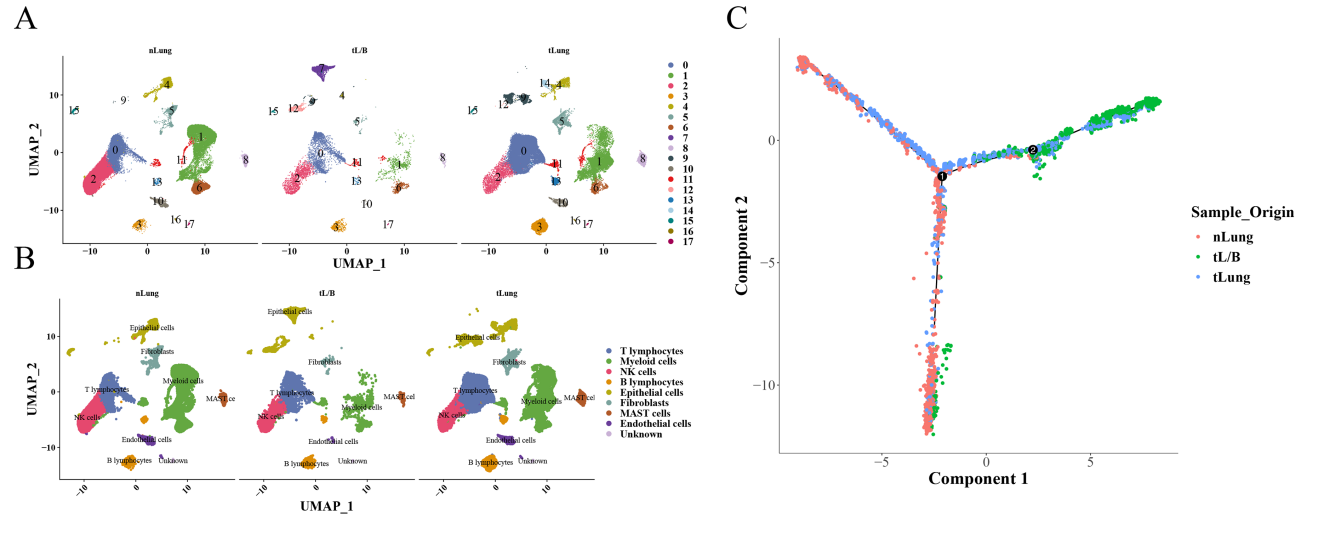

Supplement: Supplementary file 1 [file 3ac3942ec9a77a229fd51709.docx]
